# Supplementary material for: Accurate quantification of chromosomal lesions via short tandem repeat analysis using minimal amounts of DNA
Source: J Med Genet. 2017 Jun 9;54(9):640–50. doi: 10.1136/jmedgenet-2017-104528 (PMC5574397; doi:10.1136/jmedgenet-2017-104528)
Supplement: Supplementary table S2 [file jmedgenet-2017-104528supp002.xls]

## Sheet: main
Supplemental table 2: Worksheet for calculating frequencies of deleted cells from STR-derived Genemapper raw data.																			legend:
									Copy your tumor sample data here, if no germline control is available
																			allele1	position / fragment size of peak1 derived from Genemapper
																			allele2	position / fragment size of peak2 derived from Genemapper
																			AUC peak1	AUC of peak1 derived from Genemapper
	marker	sample	allele1	allele2	AUC peak1	AUC peak2	Repeat	Delta	n-th stutter present at peak1	factor for correction of stutter	corrected Peak Area 1	peak ratio in healthy control samples	peak ratio in matched sample	skewing towards peak1 for matched sample	skewing towards peak1 for healthy control samples	final proportion of del(5q) positive cells	normalisation method used		AUC peak2	AUC of peak2 derived from Genemapper
TUMOR	1_D5S1466	SAMPLE11	301		1990	NA	4	-301	-75	0	#VALUE!	no match found		NA	#VALUE!	NA	NA		Repeat	number of nucleotids within repeat
TUMOR	2_D5S2065	SAMPLE11	123	127	19658	946	2	4	2	0.119634	19544.8	1.19221		NA	0.945443	0.942295	matched healthy peak pattern		Delta	nucleotide difference between peak2 and peak1
TUMOR	3_D5S1484	SAMPLE11	265	276	1157	15499	3	11	4	0	1157	no match found		NA	#VALUE!	NA	NA		n-th stutter present at peak1	number of repeats between peak 1 and 2
TUMOR	4_D5S2860	SAMPLE11	202	206	936	9047	4	4	1	0.0592446	400.015	1.04978		NA	0.0404162	0.957882	matched healthy peak pattern		factor for correction of stutter	stutter correction factor needed in case peak1 overlapped with stutter generated from peak2
TUMOR	5_D5S404	SAMPLE11	185		823	NA	2	-185	-93	0	#VALUE!	no match found		NA	#VALUE!	NA	NA		corrected Peak Area 1	AUC of peak1 after correction for possible stutter overlap form peak2
TUMOR	6_D5S471	SAMPLE11	247	249	9746	552	2	2	1	0.294716	9583.32	1.0348		NA	0.943748	0.940395	matched healthy peak pattern		peak ratio in healthy control samples	peak ratio found in healthy samples for the matched peakpattern
TUMOR	7_D5S1505	SAMPLE11	251	258	11482	692	4	7	2	0	11482	1.04415		NA	0.940797	0.937071	matched healthy peak pattern		peak ratio in matched sample	peak ratio found in matched germline control
TUMOR	8_D5S1712	SAMPLE11	95	98	4828	29891	3	3	1	0	4828	1.04536		NA	0.133833	0.845489	matched healthy peak pattern		skewing towards peak1 for matched sample	degree of allelic skewing for the superior allele derived from matched germline sample
TUMOR	9_D5S1975	SAMPLE11	249	255	8452	27538	2	6	3	0.0833903	6155.6	1.66715		NA	0.118228	0.86592	matched healthy peak pattern		skewing towards peak1 for healthy control samples	degree of allelic skewing for the superior allele derived from matched healthy control samples
TUMOR	10_D5S818	SAMPLE11	144			NA	4	-144	-36	0	#VALUE!	no match found		NA	#VALUE!	NA	NA		final proportion of del(5q) positive cells	proportion of cells carrying del(5q) calculated for each marker individually
TUMOR	11_D5S1495	SAMPLE11	385	388	13042	752	4	3	1	0	13042	0.993768		NA	0.945805	0.942699	matched healthy peak pattern
TUMOR	12_D5S1500	SAMPLE11	369	393	488	8971	4	24	6	0	488	1.19734		NA	0.0434576	0.954568	matched healthy peak pattern
NORMAL	1_D5S1466						4	0	0	0	0	#N/A	#DIV/0!
NORMAL	2_D5S2065						2	0	0	0	0	#N/A	#DIV/0!
NORMAL	3_D5S1484						3	0	0	0	0	#N/A	#DIV/0!
NORMAL	4_D5S2860						4	0	0	0	0	#N/A	#DIV/0!
NORMAL	5_D5S404						2	0	0	0	0	#N/A	#DIV/0!
NORMAL	6_D5S471						2	0	0	0	0	#N/A	#DIV/0!
NORMAL	7_D5S1505						4	0	0	0	0	#N/A	#DIV/0!
NORMAL	8_D5S1712						3	0	0	0	0	#N/A	#DIV/0!
NORMAL	9_D5S1975						2	0	0	0	0	#N/A	#DIV/0!
NORMAL	10_D5S818						4	0	0	0	0	#N/A	#DIV/0!
NORMAL	11_D5S1495						4	0	0	0	0	#N/A	#DIV/0!
NORMAL	12_D5S1500						4	0	0	0	0	#N/A	#DIV/0!
															mean frequency of deleted cells:	0.92329
															SD frequency of deleted cells:	0.0426608
									Copy your paired data here
	marker	sample	allele1	allele2	AUC peak1	AUC peak2	Repeat	Delta	nth-stutter present at peak1	factor for correction of stutter	corrected Peak Area 1	peak ratio in healthy control samples	peak ratio in matched sample	skewing towards peak1 for matched sample	skewing towards peak1 for healthy control samples	final proportion of del(5q) positive cells	normalisation method used
TUMOR	1_D5S1466	TUMOR1	301		1990	NA	4	-301	-75	0	#VALUE!	no match found		NA	#VALUE!	NA	NA
TUMOR	2_D5S2065	TUMOR1	123	127	19658	946	2	4	2	0.119634	19544.8	1.19221		0.93729	0.945443	0.933094	germline sample
TUMOR	3_D5S1484	TUMOR1	265	276	1157	15499	3	11	4	0	1157	no match found		0.0613053	#VALUE!	0.934691	NA
TUMOR	4_D5S2860	TUMOR1	202	206	936	9047	4	4	1	0.0592446	400.015	1.04978		0.0425076	0.0404162	0.955605	germline sample
TUMOR	5_D5S404	TUMOR1	185		823	NA	2	-185	-93	0	#VALUE!	no match found		NA	#VALUE!	NA	NA
TUMOR	6_D5S471	TUMOR1	247	249	9746	552	2	2	1	0.294716	9583.32	1.0348		0.945505	0.943748	0.942365	germline sample
TUMOR	7_D5S1505	TUMOR1	251	258	11482	692	4	7	2	0	11482	1.04415		0.940073	0.940797	0.936252	germline sample
TUMOR	8_D5S1712	TUMOR1	95	98	4828	29891	3	3	1	0	4828	1.04536		0.127859	0.133833	0.853396	germline sample
TUMOR	9_D5S1975	TUMOR1	249	255	8452	27538	2	6	3	0.0833903	6155.6	1.66715		0.131434	0.118228	0.848677	germline sample
TUMOR	10_D5S818	TUMOR1	144			NA	4	-144	-36	0	#VALUE!	no match found		NA	#VALUE!	NA	NA
TUMOR	11_D5S1495	TUMOR1	385	388	750	13045	4	3	1	0	750	0.993768		0.0557001	0.0546898	0.941014	germline sample
TUMOR	12_D5S1500	TUMOR1	369	393	488	8971	4	24	6	0	488	1.19734		0.0430604	0.0434576	0.955002	germline sample
NORMAL	1_D5S1466	NORMAL1	301		4142	NA	4	-301	-75	0	#VALUE!	#N/A	#VALUE!
NORMAL	2_D5S2065	NORMAL1	123	127	10847	7222	2	4	2	0.119634	9983	1.19221	1.3823
NORMAL	3_D5S1484	NORMAL1	265	276	12547	10977	3	11	4	0	12547	#N/A	1.14303
NORMAL	4_D5S2860	NORMAL1	202	206	6920	6558	4	4	1	0.0592446	6531.47	1.04978	0.995955
NORMAL	5_D5S404	NORMAL1	185		7588	NA	2	-185	-93	0	#VALUE!	#N/A	#VALUE!
NORMAL	6_D5S471	NORMAL1	247	249	10509	8113	2	2	1	0.294716	8117.97	1.0348	1.00061
NORMAL	7_D5S1505	NORMAL1	251	258	16563	15659	4	7	2	0	16563	1.04415	1.05773
NORMAL	8_D5S1712	NORMAL1	95	98	18950	17200	3	3	1	0	18950	1.04536	1.10174
NORMAL	9_D5S1975	NORMAL1	249	255	42975	27538	2	6	3	0.0833903	40678.6	1.66715	1.47718
NORMAL	10_D5S818	NORMAL1	144			NA	4	-144	-36	0	#VALUE!	#N/A	#VALUE!
NORMAL	11_D5S1495	NORMAL1	385	388	12675	13004	4	3	1	0	12675	0.993768	0.9747
NORMAL	12_D5S1500	NORMAL1	369	393	14364	11882	4	24	6	0	14364	1.19734	1.20889
															mean frequency of deleted cells:	0.922233
															SD frequency of deleted cells:	0.0411768

## Sheet: marker-repeat
Marker	nRepeat
1_D5S1466	4
2_D5S2065	2
3_D5S1484	3
4_D5S2860	4
5_D5S404	2
6_D5S471	2
7_D5S1505	4
8_D5S1712	3
9_D5S1975	2
10_D5S818	4
11_D5S1495	4
12_D5S1500	4

## Sheet: stutter
Marker	Allele.1	no.stutter.at.low.allele	stutter.corr-Name	stutter_corr
1_D5S1466	297	1	1_D5S1466-297-1	0.0813257
1_D5S1466	301	1	1_D5S1466-301-1	0.0760111
1_D5S1466	305	1	1_D5S1466-305-1	0.294116
1_D5S1466	309	1	1_D5S1466-309-1	0.203897
10_D5S818	139	1	10_D5S818-139-1	0.0420885
10_D5S818	144	1	10_D5S818-144-1	0.0728325
10_D5S818	149	1	10_D5S818-149-1	0.0614719
10_D5S818	153	1	10_D5S818-153-1	0.0689103
10_D5S818	157	1	10_D5S818-157-1	0.0758669
12_D5S1500	366	1	12_D5S1500-366-1	0.00909105
12_D5S1500	385	1	12_D5S1500-385-1	0.0573182
12_D5S1500	389	1	12_D5S1500-389-1	0.0619551
12_D5S1500	393	1	12_D5S1500-393-1	0.0688692
2_D5S2065	117	1	2_D5S2065-117-1	0.274009
2_D5S2065	117	2	2_D5S2065-117-2	0.0462368
2_D5S2065	119	1	2_D5S2065-119-1	0.291554
2_D5S2065	119	2	2_D5S2065-119-2	0.0696922
2_D5S2065	123	1	2_D5S2065-123-1	0.360922
2_D5S2065	123	2	2_D5S2065-123-2	0.083599
2_D5S2065	123	3	2_D5S2065-123-3	0.0224578
2_D5S2065	123	4	2_D5S2065-123-4	0.0117628
2_D5S2065	125	1	2_D5S2065-125-1	0.398916
2_D5S2065	125	2	2_D5S2065-125-2	0.101767
2_D5S2065	125	3	2_D5S2065-125-3	0.0319703
2_D5S2065	125	4	2_D5S2065-125-4	0.0101663
2_D5S2065	127	1	2_D5S2065-127-1	0.401164
2_D5S2065	127	2	2_D5S2065-127-2	0.119634
2_D5S2065	127	3	2_D5S2065-127-3	0.0412046
2_D5S2065	127	4	2_D5S2065-127-4	0.0167808
2_D5S2065	129	1	2_D5S2065-129-1	0.414138
2_D5S2065	129	2	2_D5S2065-129-2	0.0989859
2_D5S2065	129	3	2_D5S2065-129-3	0.0320635
2_D5S2065	129	4	2_D5S2065-129-4	0.0117726
2_D5S2065	131	1	2_D5S2065-131-1	0.474546
2_D5S2065	131	2	2_D5S2065-131-2	0.141893
3_D5S1484	274	1	3_D5S1484-274-1	0.0791302
3_D5S1484	276	1	3_D5S1484-276-1	0.106765
3_D5S1484	279	1	3_D5S1484-279-1	0.111861
3_D5S1484	282	1	3_D5S1484-282-1	0.060311
4_D5S2860	198	1	4_D5S2860-198-1	0.0406971
4_D5S2860	202	1	4_D5S2860-202-1	0.0489733
4_D5S2860	206	1	4_D5S2860-206-1	0.0592446
4_D5S2860	210	1	4_D5S2860-210-1	0.0706054
4_D5S2860	214	1	4_D5S2860-214-1	0.08219
5_D5S404	175	1	5_D5S404-175-1	0.221169
5_D5S404	175	2	5_D5S404-175-2	0.0246903
5_D5S404	181	1	5_D5S404-181-1	0.304099
5_D5S404	181	2	5_D5S404-181-2	0.0519167
5_D5S404	181	3	5_D5S404-181-3	0.0114966
5_D5S404	183	1	5_D5S404-183-1	0.335612
5_D5S404	183	2	5_D5S404-183-2	0.0659318
5_D5S404	183	3	5_D5S404-183-3	0.0134713
5_D5S404	185	1	5_D5S404-185-1	0.364096
5_D5S404	185	2	5_D5S404-185-2	0.0779115
5_D5S404	185	3	5_D5S404-185-3	0.0201843
5_D5S404	187	1	5_D5S404-187-1	0.409361
5_D5S404	187	2	5_D5S404-187-2	0.0975578
5_D5S404	187	3	5_D5S404-187-3	0.0294214
5_D5S404	189	1	5_D5S404-189-1	0.423461
5_D5S404	189	2	5_D5S404-189-2	0.137141
5_D5S404	191	1	5_D5S404-191-1	0.464548
5_D5S404	191	2	5_D5S404-191-2	0.130755
5_D5S404	191	3	5_D5S404-191-3	0.0445111
5_D5S404	193	1	5_D5S404-193-1	0.496727
5_D5S404	193	2	5_D5S404-193-2	0.14954
5_D5S404	193	3	5_D5S404-193-3	0.0507322
5_D5S404	195	1	5_D5S404-195-1	0.507013
5_D5S404	195	2	5_D5S404-195-2	0.156297
5_D5S404	195	3	5_D5S404-195-3	0.0493358
6_D5S471	239	1	6_D5S471-239-1	0.167419
6_D5S471	239	2	6_D5S471-239-2	0.0207648
6_D5S471	241	1	6_D5S471-241-1	0.204464
6_D5S471	241	2	6_D5S471-241-2	0.0288511
6_D5S471	245	1	6_D5S471-245-1	0.243322
6_D5S471	245	2	6_D5S471-245-2	0.039682
6_D5S471	247	1	6_D5S471-247-1	0.3415
6_D5S471	247	2	6_D5S471-247-2	0.0688394
6_D5S471	247	3	6_D5S471-247-3	0.0192437
6_D5S471	249	1	6_D5S471-249-1	0.294716
6_D5S471	249	2	6_D5S471-249-2	0.0585804
6_D5S471	249	3	6_D5S471-249-3	0.0137431
6_D5S471	249	4	6_D5S471-249-4	0.00579467
6_D5S471	251	1	6_D5S471-251-1	0.335197
6_D5S471	251	2	6_D5S471-251-2	0.0754283
6_D5S471	251	3	6_D5S471-251-3	0.0210559
6_D5S471	251	4	6_D5S471-251-4	0.00899073
7_D5S1505	255	1	7_D5S1505-255-1	0.0661852
7_D5S1505	258	1	7_D5S1505-258-1	0.0938877
7_D5S1505	262	1	7_D5S1505-262-1	0.092426
7_D5S1505	266	1	7_D5S1505-266-1	0.109885
7_D5S1505	270	1	7_D5S1505-270-1	0.118779
7_D5S1505	271	1	7_D5S1505-271-1	0.113802
7_D5S1505	273	1	7_D5S1505-273-1	0.119766
8_D5S1712	82	1	8_D5S1712-82-1	0.0319036
8_D5S1712	92	1	8_D5S1712-92-1	0.199199
8_D5S1712	95	1	8_D5S1712-95-1	0.086779
8_D5S1712	101	1	8_D5S1712-101-1	0.110993
9_D5S1975	247	1	9_D5S1975-247-1	0.344024
9_D5S1975	247	2	9_D5S1975-247-2	0.090975
9_D5S1975	247	3	9_D5S1975-247-3	0.0258925
9_D5S1975	249	1	9_D5S1975-249-1	0.37821
9_D5S1975	249	2	9_D5S1975-249-2	0.111026
9_D5S1975	249	3	9_D5S1975-249-3	0.0588346
9_D5S1975	251	1	9_D5S1975-251-1	0.418528
9_D5S1975	251	2	9_D5S1975-251-2	0.101958
9_D5S1975	251	3	9_D5S1975-251-3	0.0623574
9_D5S1975	253	1	9_D5S1975-253-1	0.432722
9_D5S1975	253	2	9_D5S1975-253-2	0.130237
9_D5S1975	253	3	9_D5S1975-253-3	0.034455
9_D5S1975	255	1	9_D5S1975-255-1	0.420447
9_D5S1975	255	2	9_D5S1975-255-2	0.158001
9_D5S1975	255	3	9_D5S1975-255-3	0.0833903
9_D5S1975	255	4	9_D5S1975-255-4	0.0332226
9_D5S1975	257	1	9_D5S1975-257-1	0.476774
9_D5S1975	257	2	9_D5S1975-257-2	0.131461
9_D5S1975	257	3	9_D5S1975-257-3	0.111671
9_D5S1975	257	4	9_D5S1975-257-4	0.054741
9_D5S1975	258	1	9_D5S1975-258-1	0.420071
9_D5S1975	258	2	9_D5S1975-258-2	0.126568

## Sheet: healthy-pattern
Marker	Allele.1	Allele.2	healthy-pattern-name	peak.ratio.mean	peak.ratio.sd	peak.ratio.n
1_D5S1466	281	285	1_D5S1466-281-285	1.0683	0.0992847	4
1_D5S1466	281	289	1_D5S1466-281-289	1.07024	0.0580629	2
1_D5S1466	281	293	1_D5S1466-281-293	1.04212	0.121779	7
1_D5S1466	281	297	1_D5S1466-281-297	1.22508	0.0977854	15
1_D5S1466	281	301	1_D5S1466-281-301	1.06765	0.160964	8
1_D5S1466	281	305	1_D5S1466-281-305	1.15346	0.183973	3
1_D5S1466	281	309	1_D5S1466-281-309	1.41811	0.027475	2
1_D5S1466	285	289	1_D5S1466-285-289	1.04808	0.0686005	4
1_D5S1466	285	293	1_D5S1466-285-293	1.04538	0.0852966	4
1_D5S1466	285	297	1_D5S1466-285-297	1.07483	0.0137892	2
1_D5S1466	285	301	1_D5S1466-285-301	0.987217	0.0848728	6
1_D5S1466	289	293	1_D5S1466-289-293	1.05806	0.0258611	4
1_D5S1466	289	297	1_D5S1466-289-297	1.03373	0.0853847	5
1_D5S1466	289	301	1_D5S1466-289-301	1.02304	0.102727	8
1_D5S1466	289	305	1_D5S1466-289-305	1.15829	0.0701208	5
1_D5S1466	293	297	1_D5S1466-293-297	1.08993	0.0797019	29
1_D5S1466	293	301	1_D5S1466-293-301	0.952169	0.117318	16
1_D5S1466	293	305	1_D5S1466-293-305	0.948799	NA	1
1_D5S1466	297	301	1_D5S1466-297-301	0.869445	0.100631	49
1_D5S1466	297	305	1_D5S1466-297-305	1.09461	0.0777644	11
1_D5S1466	297	309	1_D5S1466-297-309	1.10274	0.0533043	2
1_D5S1466	301	305	1_D5S1466-301-305	1.11332	0.12335	6
1_D5S1466	301	309	1_D5S1466-301-309	1.17117	NA	1
10_D5S818	131	157	10_D5S818-131-157	1.32418	NA	1
10_D5S818	139	149	10_D5S818-139-149	1.0702	0.0742068	2
10_D5S818	139	153	10_D5S818-139-153	1.16464	0.052081	6
10_D5S818	139	157	10_D5S818-139-157	1.15532	0.0674296	6
10_D5S818	144	149	10_D5S818-144-149	0.996514	0.0596598	6
10_D5S818	144	153	10_D5S818-144-153	1.09253	0.0566266	15
10_D5S818	144	157	10_D5S818-144-157	1.06709	0.0641287	3
10_D5S818	149	153	10_D5S818-149-153	1.05491	0.0532337	64
10_D5S818	149	157	10_D5S818-149-157	1.11377	0.0568887	28
10_D5S818	153	157	10_D5S818-153-157	1.05311	0.0544141	30
11_D5S1495	372	381	11_D5S1495-372-381	1.05565	0.0951062	2
11_D5S1495	381	385	11_D5S1495-381-385	1.00469	0.129231	32
11_D5S1495	381	386	11_D5S1495-381-386	0.925861	0.0513822	13
11_D5S1495	381	388	11_D5S1495-381-388	0.873747	0.188554	6
11_D5S1495	381	390	11_D5S1495-381-390	0.936276	0.0550554	18
11_D5S1495	381	392	11_D5S1495-381-392	1.19469	0.037271	2
11_D5S1495	385	388	11_D5S1495-385-388	0.993768	0.166491	20
11_D5S1495	385	390	11_D5S1495-385-390	0.906117	0.103921	22
11_D5S1495	385	392	11_D5S1495-385-392	0.882342	0.211725	4
11_D5S1495	386	388	11_D5S1495-386-388	1.46919	0.0565709	2
11_D5S1495	386	390	11_D5S1495-386-390	1.07433	0.0201916	2
11_D5S1495	388	390	11_D5S1495-388-390	1.35477	0.257206	9
11_D5S1495	388	392	11_D5S1495-388-392	1.62034	0.137606	5
11_D5S1495	390	392	11_D5S1495-390-392	1.1537	0.364764	4
12_D5S1500	366	369	12_D5S1500-366-369	1.04123	0.0336696	21
12_D5S1500	366	385	12_D5S1500-366-385	1.06144	0.30314	16
12_D5S1500	366	389	12_D5S1500-366-389	1.20502	0.0860663	31
12_D5S1500	366	393	12_D5S1500-366-393	1.26788	0.0812519	21
12_D5S1500	366	397	12_D5S1500-366-397	1.24094	0.0797092	4
12_D5S1500	369	385	12_D5S1500-369-385	1.13576	0.0338233	4
12_D5S1500	369	389	12_D5S1500-369-389	1.18172	0.0628128	8
12_D5S1500	369	393	12_D5S1500-369-393	1.19734	0.0830632	24
12_D5S1500	369	397	12_D5S1500-369-397	1.35174	0.0968218	4
12_D5S1500	385	389	12_D5S1500-385-389	1.01021	0.133713	16
12_D5S1500	385	393	12_D5S1500-385-393	1.03531	0.0399232	4
12_D5S1500	389	393	12_D5S1500-389-393	1.05184	0.0536883	31
12_D5S1500	389	397	12_D5S1500-389-397	1.09157	0.0219502	4
2_D5S2065	117	127	2_D5S2065-117-127	1.39196	NA	1
2_D5S2065	119	125	2_D5S2065-119-125	1.43018	0.0716067	2
2_D5S2065	119	129	2_D5S2065-119-129	1.35518	NA	1
2_D5S2065	121	123	2_D5S2065-121-123	1.44336	0.0130762	2
2_D5S2065	123	125	2_D5S2065-123-125	1.18169	0.0906465	25
2_D5S2065	123	127	2_D5S2065-123-127	1.19221	0.103627	31
2_D5S2065	123	129	2_D5S2065-123-129	1.13029	0.0819174	33
2_D5S2065	123	131	2_D5S2065-123-131	1.35798	0.116919	8
2_D5S2065	125	127	2_D5S2065-125-127	0.990734	0.140105	6
2_D5S2065	125	129	2_D5S2065-125-129	1.05713	0.112064	22
2_D5S2065	127	129	2_D5S2065-127-129	0.977146	0.0802636	7
2_D5S2065	127	131	2_D5S2065-127-131	0.978091	0.161748	4
2_D5S2065	129	129	2_D5S2065-129-129	1.70359	NA	1
2_D5S2065	129	131	2_D5S2065-129-131	0.912547	0.0307666	2
3_D5S1484	274	276	3_D5S1484-274-276	1.00367	0.0120427	4
3_D5S1484	274	279	3_D5S1484-274-279	1.11347	NA	1
3_D5S1484	274	282	3_D5S1484-274-282	1.00409	0.0388278	2
3_D5S1484	276	279	3_D5S1484-276-279	1.02752	0.0393294	14
3_D5S1484	276	282	3_D5S1484-276-282	0.971543	0.0646238	65
3_D5S1484	279	282	3_D5S1484-279-282	0.857272	0.0397684	24
3_D5S1484	279	285	3_D5S1484-279-285	1.02799	NA	1
3_D5S1484	282	285	3_D5S1484-282-285	0.934752	0.0389002	3
4_D5S2860	186	194	4_D5S2860-186-194	1.34817	0.243479	6
4_D5S2860	186	198	4_D5S2860-186-198	1.08533	0.0818103	5
4_D5S2860	186	202	4_D5S2860-186-202	1.15974	0.121485	21
4_D5S2860	186	206	4_D5S2860-186-206	1.24505	0.142226	30
4_D5S2860	186	210	4_D5S2860-186-210	1.24815	0.114377	11
4_D5S2860	186	214	4_D5S2860-186-214	1.26176	0.0491731	2
4_D5S2860	190	202	4_D5S2860-190-202	1.19336	0.0717405	2
4_D5S2860	190	206	4_D5S2860-190-206	1.2619	0.189574	5
4_D5S2860	194	198	4_D5S2860-194-198	1.07873	0.00553494	2
4_D5S2860	194	206	4_D5S2860-194-206	1.1337	NA	1
4_D5S2860	198	202	4_D5S2860-198-202	0.977389	0.0628732	2
4_D5S2860	198	206	4_D5S2860-198-206	1.06664	0.0889155	11
4_D5S2860	202	206	4_D5S2860-202-206	1.04978	0.0676585	31
4_D5S2860	202	210	4_D5S2860-202-210	1.0968	0.0571971	13
4_D5S2860	202	214	4_D5S2860-202-214	1.11727	0.0539519	2
4_D5S2860	206	210	4_D5S2860-206-210	1.01847	0.103532	27
4_D5S2860	206	214	4_D5S2860-206-214	1.01099	0.220743	2
4_D5S2860	210	214	4_D5S2860-210-214	1.10639	0.057629	4
5_D5S404	175	183	5_D5S404-175-183	0.0644226	NA	1
5_D5S404	175	187	5_D5S404-175-187	1.42374	0.148161	2
5_D5S404	181	183	5_D5S404-181-183	1.12654	0.066914	25
5_D5S404	181	185	5_D5S404-181-185	1.18669	0.0453202	34
5_D5S404	181	187	5_D5S404-181-187	1.2221	0.0760736	27
5_D5S404	181	189	5_D5S404-181-189	1.32036	0.0979682	5
5_D5S404	181	191	5_D5S404-181-191	1.39092	0.0486223	14
5_D5S404	181	193	5_D5S404-181-193	1.45361	0.151888	3
5_D5S404	183	185	5_D5S404-183-185	1.09259	0.015758	5
5_D5S404	183	187	5_D5S404-183-187	1.20331	0.0849063	5
5_D5S404	183	191	5_D5S404-183-191	1.29815	0.0690774	13
5_D5S404	183	193	5_D5S404-183-193	1.63333	NA	1
5_D5S404	185	187	5_D5S404-185-187	1.12455	0.0205106	3
5_D5S404	185	189	5_D5S404-185-189	1.23681	0.0442025	7
5_D5S404	185	191	5_D5S404-185-191	1.17898	0.0959921	4
5_D5S404	185	195	5_D5S404-185-195	1.40334	0.00702171	2
5_D5S404	187	189	5_D5S404-187-189	1.14081	0.0680254	2
5_D5S404	187	191	5_D5S404-187-191	1.23132	0.0584659	3
5_D5S404	189	191	5_D5S404-189-191	1.11548	0.110227	2
5_D5S404	191	193	5_D5S404-191-193	1.07234	0.00412036	2
6_D5S471	239	241	6_D5S471-239-241	1.15569	0.10565	2
6_D5S471	239	243	6_D5S471-239-243	1.43331	0.0635489	3
6_D5S471	239	245	6_D5S471-239-245	1.38713	0.0584197	12
6_D5S471	239	247	6_D5S471-239-247	1.55849	0.334857	8
6_D5S471	239	249	6_D5S471-239-249	1.53593	0.102575	56
6_D5S471	239	251	6_D5S471-239-251	1.70599	0.195188	15
6_D5S471	241	249	6_D5S471-241-249	1.3134	0.072871	3
6_D5S471	243	247	6_D5S471-243-247	1.10529	0.0436656	2
6_D5S471	243	249	6_D5S471-243-249	1.26376	NA	1
6_D5S471	245	247	6_D5S471-245-247	1.08229	0.0742807	5
6_D5S471	245	249	6_D5S471-245-249	1.18492	0.0813341	26
6_D5S471	245	251	6_D5S471-245-251	1.19971	0.0735136	7
6_D5S471	247	249	6_D5S471-247-249	1.0348	0.057574	8
6_D5S471	247	251	6_D5S471-247-251	1.15414	NA	1
6_D5S471	249	251	6_D5S471-249-251	1.15184	0.134647	24
7_D5S1505	242	251	7_D5S1505-242-251	1.04367	NA	1
7_D5S1505	242	258	7_D5S1505-242-258	1.11734	0.0840454	2
7_D5S1505	242	262	7_D5S1505-242-262	1.18683	0.0592562	4
7_D5S1505	247	255	7_D5S1505-247-255	1.04479	0.125294	2
7_D5S1505	247	258	7_D5S1505-247-258	1.15673	0.0790631	2
7_D5S1505	247	259	7_D5S1505-247-259	0.52088	0.0739696	2
7_D5S1505	247	262	7_D5S1505-247-262	1.14946	0.0358461	4
7_D5S1505	247	263	7_D5S1505-247-263	1.24603	0.055164	6
7_D5S1505	251	255	7_D5S1505-251-255	1.09105	0.0847946	7
7_D5S1505	251	258	7_D5S1505-251-258	1.04415	0.044564	17
7_D5S1505	251	259	7_D5S1505-251-259	1.01027	NA	1
7_D5S1505	251	262	7_D5S1505-251-262	1.09548	0.0687514	22
7_D5S1505	251	263	7_D5S1505-251-263	1.13907	NA	1
7_D5S1505	251	270	7_D5S1505-251-270	1.17677	0.0129861	2
7_D5S1505	251	273	7_D5S1505-251-273	1.24754	NA	1
7_D5S1505	255	258	7_D5S1505-255-258	1.07696	0.140185	19
7_D5S1505	255	262	7_D5S1505-255-262	1.0673	0.090785	12
7_D5S1505	255	263	7_D5S1505-255-263	1.08185	0.0466881	9
7_D5S1505	255	270	7_D5S1505-255-270	1.15841	0.0524089	7
7_D5S1505	258	262	7_D5S1505-258-262	1.0156	0.052493	19
7_D5S1505	258	263	7_D5S1505-258-263	1.08789	0.0509389	31
7_D5S1505	258	267	7_D5S1505-258-267	1.11803	0.0893906	4
7_D5S1505	258	270	7_D5S1505-258-270	1.11194	0.0194423	2
7_D5S1505	258	276	7_D5S1505-258-276	1.11803	0.0893906	4
7_D5S1505	259	262	7_D5S1505-259-262	1.10878	0.0343245	2
7_D5S1505	259	270	7_D5S1505-259-270	1.09003	NA	1
7_D5S1505	259	273	7_D5S1505-259-273	1.09316	0.0305502	2
7_D5S1505	262	263	7_D5S1505-262-263	1.02688	0.028025	23
7_D5S1505	263	270	7_D5S1505-263-270	1.21799	0.066967	3
8_D5S1712	82	85	8_D5S1712-82-85	1.0067	NA	1
8_D5S1712	82	92	8_D5S1712-82-92	1.11648	0.00903174	4
8_D5S1712	82	95	8_D5S1712-82-95	1.06034	0.107203	22
8_D5S1712	82	98	8_D5S1712-82-98	1.07866	0.0990373	8
8_D5S1712	85	95	8_D5S1712-85-95	0.973418	0.140656	10
8_D5S1712	88	92	8_D5S1712-88-92	1.11885	0.0457876	2
8_D5S1712	88	95	8_D5S1712-88-95	1.09699	0.0102326	2
8_D5S1712	92	92	8_D5S1712-92-92	0.534196	NA	1
8_D5S1712	92	95	8_D5S1712-92-95	0.869994	0.0373847	19
8_D5S1712	92	98	8_D5S1712-92-98	1.09117	0.0661837	2
8_D5S1712	95	98	8_D5S1712-95-98	1.04536	0.0815738	4
8_D5S1712	98	98	8_D5S1712-98-98	1.12305	0.0457256	4
9_D5S1975	247	249	9_D5S1975-247-249	1.09238	0.13014	8
9_D5S1975	247	253	9_D5S1975-247-253	1.65422	0.143732	23
9_D5S1975	247	255	9_D5S1975-247-255	0.867154	NA	1
9_D5S1975	247	257	9_D5S1975-247-257	1.86308	0.120107	5
9_D5S1975	247	258	9_D5S1975-247-258	1.07825	0.0466547	2
9_D5S1975	249	253	9_D5S1975-249-253	1.66779	0.0902883	9
9_D5S1975	249	255	9_D5S1975-249-255	1.66715	0.113048	6
9_D5S1975	249	257	9_D5S1975-249-257	1.55769	NA	1
9_D5S1975	251	253	9_D5S1975-251-253	1.58204	0.10084	2
9_D5S1975	251	258	9_D5S1975-251-258	2.08785	0.145841	2
9_D5S1975	253	255	9_D5S1975-253-255	1.04632	0.0888546	4
9_D5S1975	253	257	9_D5S1975-253-257	1.21285	0.0934073	23
9_D5S1975	253	258	9_D5S1975-253-258	1.03844	0.207394	7
9_D5S1975	255	257	9_D5S1975-255-257	1.2772	0.317413	5
